# Supplementary material
Source: publisher figshare collection journal article supplement (https://acs.figshare.com/ndownloader/files/3701533)
Supplement: Supplementary file 1 [file 3701533]

## Supporting information

*of*

### **An MMP-2 responsive liposome integrating anti-fibrosis and chemotherapeutic drugs for enhanced drug perfusion and efficacy in pancreatic cancer**

*Tianjiao Ji,† Suping Li,\*† Yinlong Zhang,† § Jiayan Lang,† Yanping Ding,† Xiao  
Zhao,‡ Ruifang Zhao,† Yiye Li,† Jian Shi,† Jihui Hao,‡ Ying Zhao,\*† Guangjun  
Nie\*†*

*† CAS Key Laboratory for Biomedical Effects of Nanomaterials and Nanosafety, &  
CAS Center for Excellence in Nanoscience, National Center for Nanoscience and  
Technology, No. 11 Beiyitiao, Zhongguancun, Beijing 100190, China*

*‡ Department of Pancreatic Carcinoma Tianjin Medical University Cancer Institute  
and Hospital National Clinical Research Center of Cancer Key Laboratory of Cancer  
Prevention and Therapy Tianjin, 300060, China*

*§ College of Pharmaceutical Science, Jilin University, Changchun 130021, China*

*\*Corresponding author. Tel.: +86-10-82545529.*

*E-mail address: niegj@nanocr.cn (G. Nie); zhaoying@nanocr.cn (Y. Zhao);*

*lisuping@nanocr.cn (S. Li).*

## Supporting Tables and Figures

**Table S1.** Characterization of LRC and LC NPs and drug-loaded LRC

| Groups      | Particles size (nm) | Zeta potential (mV) | Polydispersity |
|-------------|---------------------|---------------------|----------------|
| LRC         | $68.2 \pm 3.7$      | $-27.6 \pm 0.3$     | 0.29           |
| LC          | $65.8 \pm 2.9$      | $-28.5 \pm 0.4$     | 0.31           |
| LRC-GEM     | $71.3 \pm 2.1$      | $-28.7 \pm 0.2$     | 0.28           |
| LC-GEM      | $67.5 \pm 3.1$      | $-29.2 \pm 0.4$     | 0.29           |
| LRC-PFD     | $70.8 \pm 2.5$      | $-28.6 \pm 0.2$     | 0.30           |
| LRC-GEM-PFD | $71.5 \pm 4.2$      | $-30.8 \pm 0.5$     | 0.28           |

All results were determined by DLS. Nanoparticles were prepared by dissolving in PBS (pH 7.4) at a concentration of 0.2 mg/mL of LRC or LC. Results are mean  $\pm$  S.D. (n=3).

**Table S2.** Encapsulation efficiencies of LRC and LC with different mass of PFD or GEM added (the mass of LRC and LC used was 1.0 mg)

|                | PFD added ( $\mu\text{g}$ )        | 10   | 20   | 50   | 100   | 200   | 500   |
|----------------|------------------------------------|------|------|------|-------|-------|-------|
| <b>LRC-PFD</b> | PFD encapsulated ( $\mu\text{g}$ ) | 9.8  | 19.2 | 42.2 | 74.6  | 88.7  | 88.2  |
|                | Encapsulation efficiency (%)       | 98   | 96   | 84.4 | 74.6  | 44.4  | 17.6  |
|                | GEM added ( $\mu\text{g}$ )        | 50   | 100  | 200  | 500   | 1000  | 2000  |
| <b>LRC-GEM</b> | GEM encapsulated ( $\mu\text{g}$ ) | 25.2 | 42.3 | 80.2 | 147.6 | 146.5 | 146.2 |
|                | Encapsulation efficiency (%)       | 50.4 | 42.3 | 40.1 | 29.5  | 14.7  | 7.3   |
| <b>LC-GEM</b>  | GEM encapsulated ( $\mu\text{g}$ ) | 24.3 | 43.8 | 81.6 | 145.2 | 145.9 | 144.3 |
|                | Encapsulation efficiency (%)       | 48.6 | 43.8 | 40.8 | 29.0  | 14.6  | 7.2   |

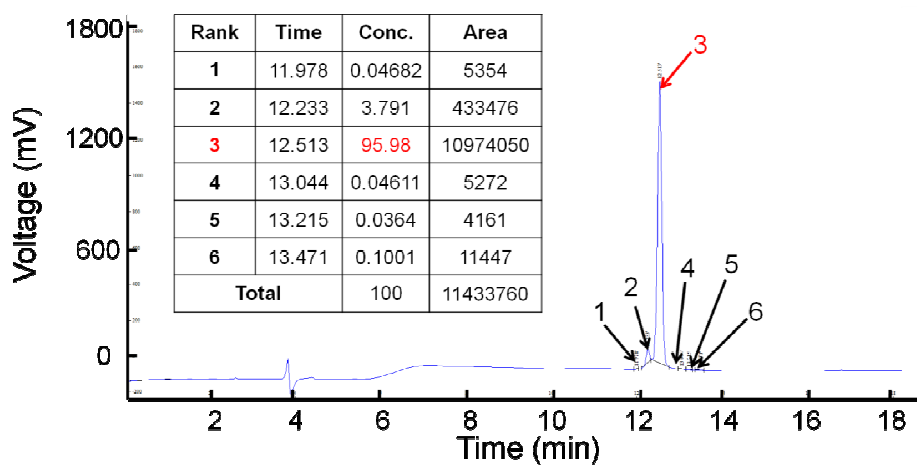

**Figure S1.** The purity of the MMP-2 responsive peptide. The purity of the peptide was 95.98%.

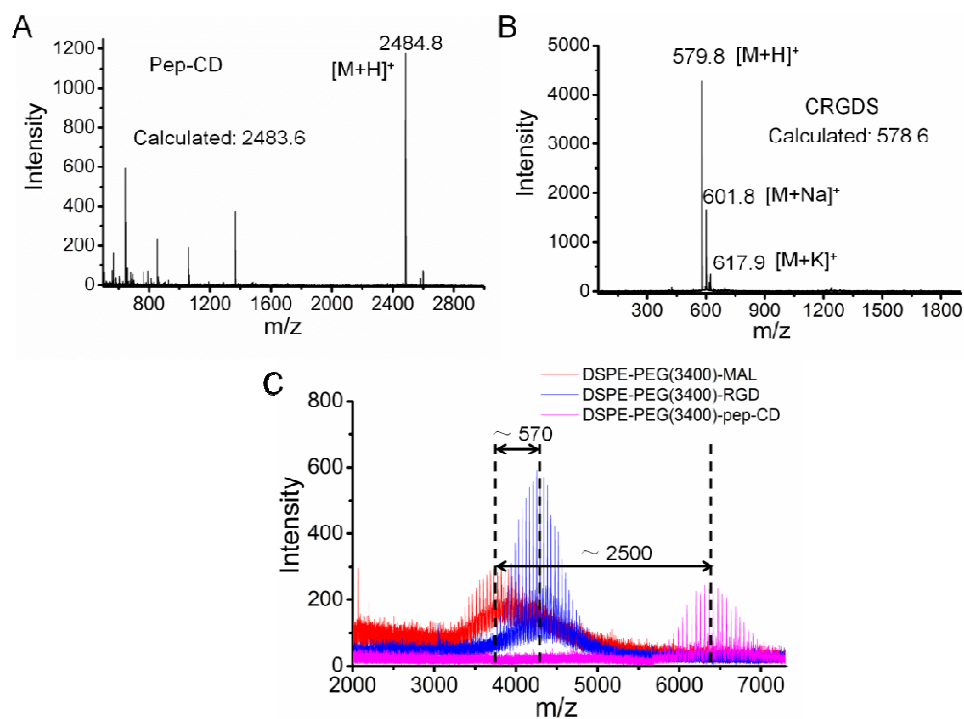

**Figure S2.** The molecular mass of the pep-CD (A), RGD peptide (CRGDS) (B), DSPE-PEG(3400)-pep-CD and DSPE-PEG(3400)-RGD (C) detected by

MALDI-TOF MS.

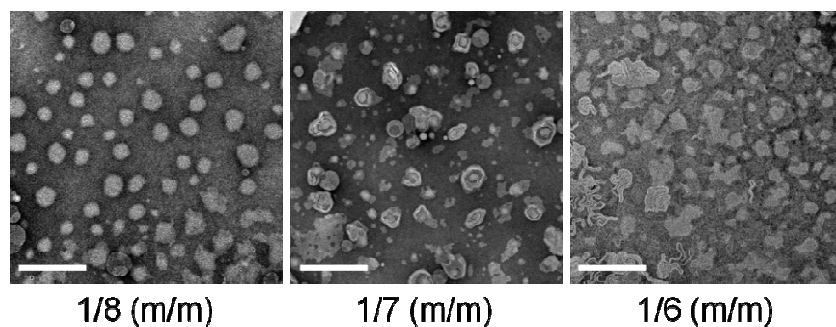

**Figure S3.** The morphology changes with the increasing the ratio of DSPE-PEG(2000)-pep-CD. The system can not form a regular morphology when the DSPE-PEG(2000)-pep-CD beyond the 1/8 (m/m) ratio. The scale bar is 200 nm.

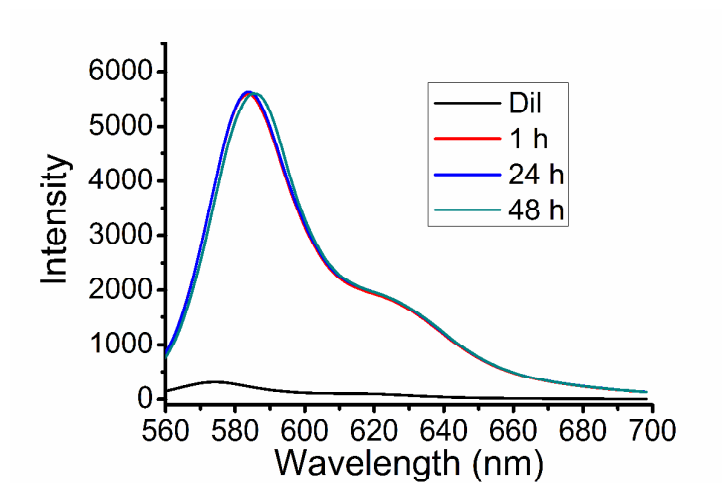

**Figure S4.** Stability of LRC nanostructure in vitro.

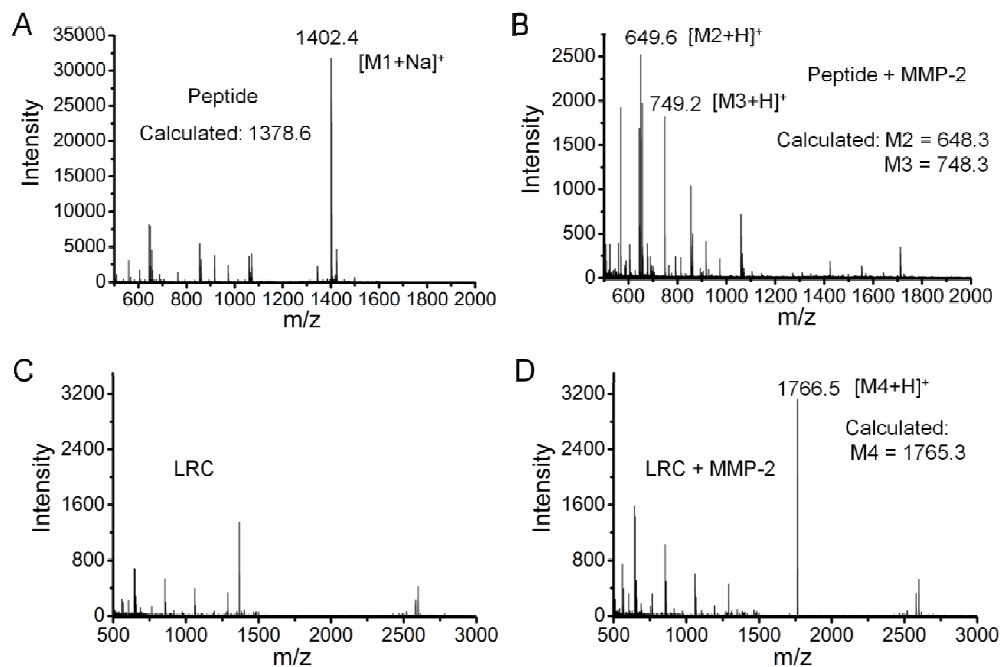

**Figure S5.** The responsiveness of peptide (A, B) and LRC (C, D) detected by MALDI-TOF MS.

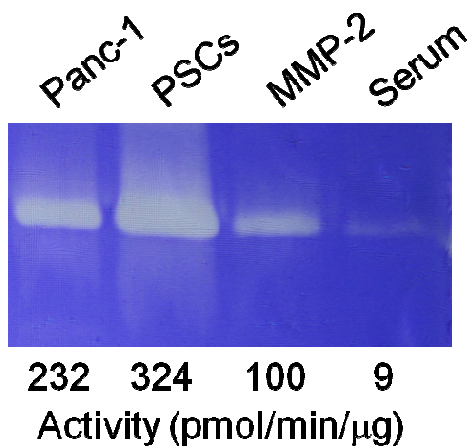

**Figure S6.** The activity of MMP-2 expressed in cells determined by gelatin zymography assay. Purified MMP-2 was used as positive control.

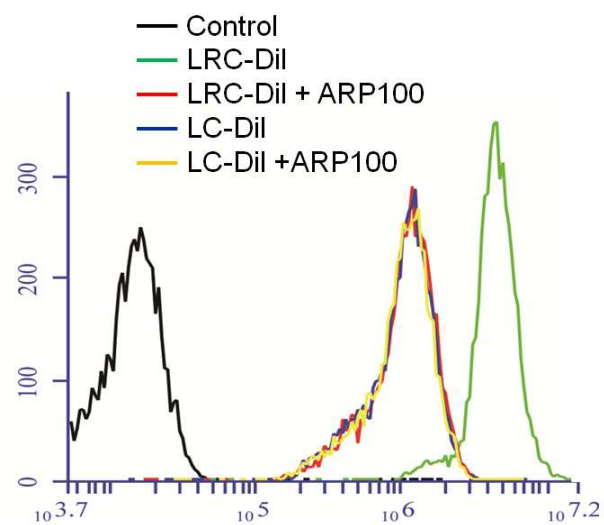

**Figure S7.** Flow cytometry detection of the cell uptake of LRC-Dil and LC-Dil in vitro

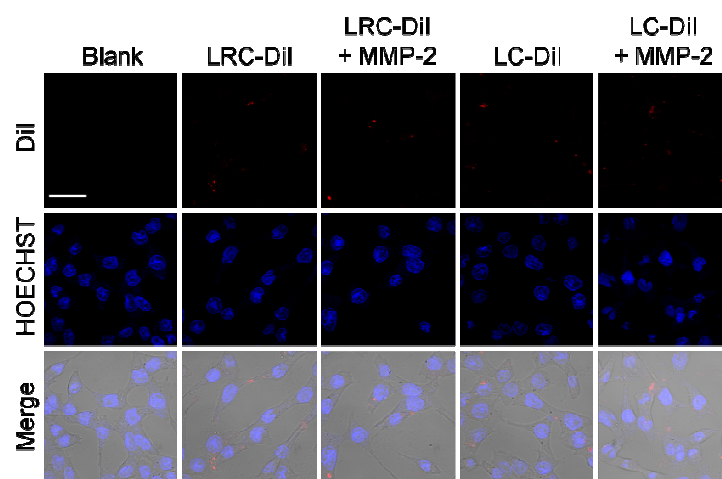

**Figure S8.** The COS7 cell uptake of Dil labeled LRC and LC with or without MMP-2.

The red: Dil; blue: HOECHST. The scale bar, 50  $\mu$ m.

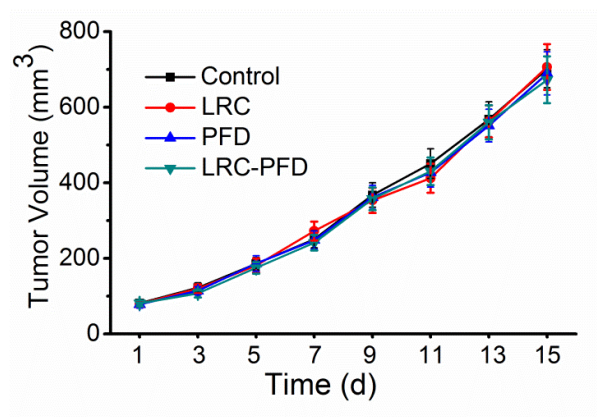

**Figure S9.** The tumor growth curves of PSCs/Panc-1 co-implanted pancreatic tumor treated by different PFD formulations. PFD dose: 10 mg/kg. The volume of tumors in each group did not exhibited significant differences with others.

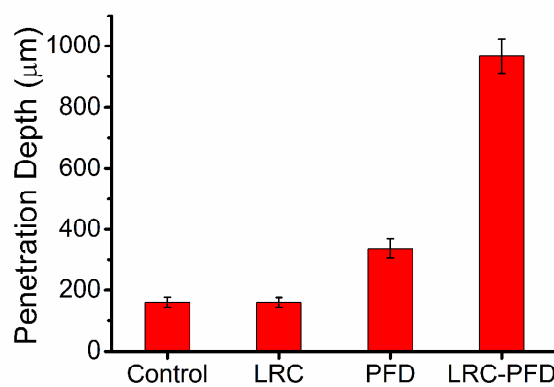

**Figure S10.** The penetration depths of Rhd in different formulations' treated groups.



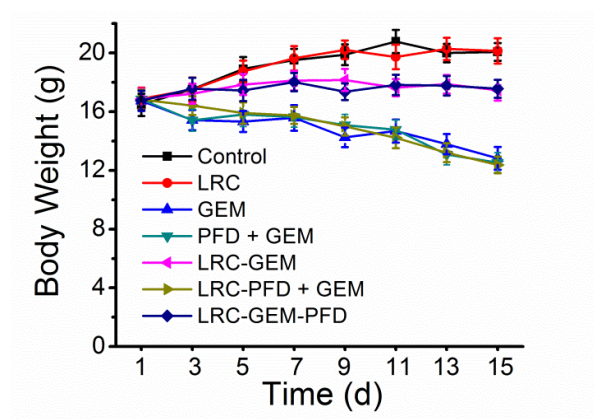

**Figure S11.** The body weight changes of PSCs/Panc-1 pancreatic tumor bearing mice during different GEM formulations' treatment. GEM dose: 20 mg/kg.
